# Supplementary material
Source: PubMed Central journal article supplement (PMC1839941)
Supplement: NIHMS18855-supplement-SuppTables.pdf [file NIHMS18855-supplement-SuppTables.pdf]

**Table S1.** Sequence data and reactivity of antibodies from IgG+ memory B cells from healthy donor VB

| Ig     | HEAVY |      |    |     |        |                       | LIGHT     |        |          |          |    |        | REACTIVITY   |           |       |       |         |         |        |        |        |        |        |        |        |        |      |
|--------|-------|------|----|-----|--------|-----------------------|-----------|--------|----------|----------|----|--------|--------------|-----------|-------|-------|---------|---------|--------|--------|--------|--------|--------|--------|--------|--------|------|
|        | gmVB  | VH   | D  | RF  | JH     | V-Mut.                | CDR3 (aa) | (+)    | Length   | Subclass | Vκ | Jκ     | V-Mut.       | CDR3 (aa) | ssDNA | dsDNA | LPS     | insulin | Hep2   | S. aur | S.pyo  | S.pneu | E.fae  | E.coli | Pn-Vax | PedHIB | Meno |
| VB1    | 4-59  | 6-13 | 2  | 4   | 17     | GSGSRAAVPDY           | 1         | 11     | IgG1     | 4-1      | 3  | 2      | QQYTTSSST    | +         | +     | +     | +       | +       | +      | +      | +      | +      | +      | +      | +      | +      | +    |
| VB4    | 4-39  | /    | /  | 2   | 27     | HERKGHTWYFDL          | 4         | 12     | IgG1     | 3-11     | 3  | 15     | QMRNYGWPFVT  | +         | +     | +     | +       | +       | +      | +      | +      | +      | +      | +      | +      | +      | +    |
| VB7#   | 3-74  | /    | /  | 4/5 | 28     | DQSVAGTKTQDF          | 1         | 12     | IgG2     | 3-15     | 1  | 11     | QQYNNWWT     |           |       |       |         |         |        |        |        |        |        |        |        |        |      |
| VB10#  | 4-31* | 2-21 | 2  | 4   | 35     | ETTLVQVGGDCYSGPFDY    | 0         | 18     | IgG2     | 4-1      | 3  | 14     | QQYSART      |           |       |       |         |         |        |        |        |        |        |        |        |        |      |
| VB11#  | 4-34  | 2-2  | 2  | 5   | 27     | NCSSSSCYGDS           | 0         | 11     | IgG4     | 2-28     | 2  | 8      | MQALQTPYT    |           |       |       |         |         |        |        |        |        |        |        |        |        |      |
| VB23#  | 4-31* | /    | /  | 5   | 19     | ELSFSSGHPPRFDP        | 2         | 15     | IgG1     | 1-5*     | 1  | 10     | QQYNTYSRT    |           |       |       |         |         |        |        |        |        |        |        |        |        |      |
| VB26#  | 3-30  | 3-22 | 2  | 4   | 22     | DFYYVDSRGYSRTRLRFES   | 4         | 19     | IgG1     | 1-13     | 4  | 19     | QQDFDQLT     |           |       |       |         |         |        |        |        |        |        |        |        |        |      |
| VB34   | 3-30  | 1-26 | 1  | 3   | 24     | AVEWEILEPRNNPFDL      | 1         | 16     | IgG1     | 3-20     | 2  | 14     | QLYGDSPYP    | /         | /     | /     | /       | /       | /      | /      | /      | /      | /      | /      | /      | /      | +    |
| VB41#  | 3-15  | 4-23 | 1  | 4   | 17     | DHEFLRSHFDT           | 3         | 11     | IgG1     | 3-20     | 3  | 8      | QQYGSSPLFT   |           |       |       |         |         |        |        |        |        |        |        |        |        |      |
| VB50   | 3-11  | 1-26 | 3  | 4   | 15     | DRRGIVGVSDY           | 2         | 11     | IgG1     | 1-5*     | 1  | 2      | QQYTSYTRT    | /         | /     | /     | /       | /       | +      | +      | +      | +      | +      | /      | +      | +      | +    |
| VB52   | 3-53  | /    | /  | 6   | 18     | DGHAGGSYFYGGMDV       | 1         | 16     | IgG1     | 1-39     | 3  | 6      | QQYTSYTRT    | /         | /     | /     | /       | /       | /      | /      | /      | /      | /      | /      | /      | /      | /    |
| VB54#  | 3-23  | /    | /  | 2   | ND     | DEGGRSKLARIRLLSGYLDL  | 4         | 20     | IgG1     | 3-20     | 1  | 9      | QQYGSYVWT    |           |       |       |         |         |        |        |        |        |        |        |        |        |      |
| VB56   | 3-7*  | /    | /  | 6   | 7      | DFYTPSTNYYYGMDV       | 0         | 16     | IgG1     | 3-15     | 1  | 0      | QQYNNWPPST   | /         | /     | /     | /       | /       | /      | /      | /      | /      | /      | /      | /      | /      | /    |
| VB57   | 4-31* | 3-3  | 2  | 4   | 15     | HGAGYYDY              | 1         | 8      | IgG3     | 3-20     | 1  | 8      | QQYGHSHWT    | /         | /     | /     | /       | +       | /      | /      | +      | /      | /      | +      | /      | /      | /    |
| VB58#  | 4-31* | 4-17 | 2  | 4   | 28     | DRRVYDGFGLDR          | 3         | 13     | IgG1     | 1-5*     | 2  | 11     | QHYNNTST     | /         | /     | /     | /       | /       | /      | /      | /      | /      | /      | /      | /      | /      | /    |
| VB60   | 3-11  | 3-10 | 1  | 4   | 12     | VGRWFGELIYAADN        | 1         | 14     | IgG1     | 3-15     | 4  | 4      | QQYNNWPPGFLT | /         | /     | /     | /       | +       | /      | /      | /      | /      | /      | /      | /      | /      | /    |
| VB65   | 3-74  | 2-15 | 2  | 6   | 14     | VRGTTSLMYSYGMVDV      | 1         | 16     | IgG4     | 1-39     | 2  | 13     | QQSYKTPYT    | /         | /     | /     | /       | /       | /      | /      | /      | /      | /      | /      | /      | /      | /    |
| VB68#  | 5-51  | /    | /  | 5   | 31     | HESAMAEFDS            | 1         | 10     | IgG1     | 1-5      | 4  | 11     | QKYDYSVLT    |           |       |       |         |         |        |        |        |        |        |        |        |        |      |
| VB72   | 3-30  | 3-10 | 2  | 4   | 8      | GRGYGSGTYYPQGLDC      | 2         | 18     | IgG1     | 2-28     | 1  | 10     | MQALQSPWT    | +         | +     | +     | +       | +       | +      | +      | +      | +      | +      | +      | +      | +      | +    |
| VB78#  | 4-31* | 2-2  | 1  | 4   | 21     | ILVVPAGPFGFDY         | 0         | 14     | IgG2     | 3-20     | 2  | 9      | QQYGSSLMYT   |           |       |       |         |         |        |        |        |        |        |        |        |        |      |
| VB83   | 4-34  | 3-22 | 2  | 3   | 22     | ARYSGYYVPAEI          | 1         | 13     | IgG1     | 1-39     | 3  | 14     | LQSYVNPFT    | /         | /     | /     | /       | +       | /      | /      | /      | /      | /      | /      | /      | /      | /    |
| VB86   | 3-33  | 3-9  | 1  | 6   | 22     | DAGYDWRNIYRNLGDV      | 2         | 18     | IgG3     | 1-17     | 2  | 5      | LQHSPPFT     | /         | /     | /     | /       | +       | +      | +      | +      | +      | +      | +      | +      | +      | +    |
| VB92#  | 1-24  | 3-22 | 2  | 4   | 8      | ASPTYDGNDFGKVFDS      | 1         | 17     | IgG1     | 1-39     | 2  | 5      | QQYTSYTPYT   |           |       |       |         |         |        |        |        |        |        |        |        |        |      |
| VB110  | 4-61  | /    | /  | 3   | 22     | NRSSEVSFDI            | 1         | 10     | IgG4     | 4-1      | 2  | 11     | QQYHSIPTY    | /         | /     | /     | /       | /       | /      | /      | /      | /      | /      | /      | /      | /      | /    |
| VB111  | 3-48  | 2-21 | 3  | 4   | 8      | DRVVGIFDH             | 2         | 9      | IgG1     | 4-1      | 1  | 2      | QQYYSIPWT    | /         | /     | /     | /       | +       | /      | /      | /      | /      | /      | /      | /      | /      | /    |
| VB114# | 3-74  | /    | /  | 4   | 13     | HGGNTAFVDF            | 1         | 10     | IgG1     | 3-20     | 1  | 11     | QHYGSSGET    |           |       |       |         |         |        |        |        |        |        |        |        |        |      |
| VB120# | 3-49  | 3-3  | 2  | 4   | 7      | NYDFWVSGDFDY          | 0         | 12     | IgG1     | 1-39     | 1  | 10     | QQTHSAPRT    |           |       |       |         |         |        |        |        |        |        |        |        |        |      |
| VB121# | 3-7*  | 5-12 | 2  | 3   | 31     | DQDYERNGIYDAFDV       | 1         | 16     | IgG3     | 1-6      | 1  | 25     | LQDYTPRT     |           |       |       |         |         |        |        |        |        |        |        |        |        |      |
| VB126  | 4-39  | /    | /  | 5   | 34     | HVLVDDPNWFDV          | 1         | 12     | IgG2     | 3D-15    | 3  | 9      | QHYNRWPPGIT  | +         | +     | +     | +       | +       | +      | +      | +      | +      | +      | +      | +      | +      | +    |
| VB129  | 3-23  | 1-26 | 2  | 4   | 27     | TSNWWGARSYFDY         | 1         | 12     | IgG1     | 1-39     | 5  | 13     | QHYSYIPTY    | /         | /     | /     | /       | /       | /      | /      | /      | /      | /      | /      | /      | /      | +    |
| VB132  | 3-23  | 3-22 | 2  | 3   | 15     | TYYYDNSG              | 0         | 8      | IgG2     | 1-5*     | 4  | 9      | QHYSYIPLY    | +         | +     | +     | +       | +       | +      | +      | +      | +      | +      | +      | +      | +      | +    |
| VB137  | 3-30  | 5-12 | 2  | 1   | 31     | DVGGIGYSYEGHL         | 1         | 13     | IgG1     | 1-5      | 1  | 27     | QHYNTPPWT    | /         | /     | /     | /       | +       | /      | +      | /      | +      | /      | +      | /      | +      | +    |
| VB139# | 5-51  | /    | /  | 4   | 22     | HGAMISAPSSFFD         | 1         | 13     | IgG1     | 4-1      | 3  | 19     | QQYFRPFT     |           |       |       |         |         |        |        |        |        |        |        |        |        |      |
| VB140  | 3-21  | 3-22 | 2  | 2   | 18     | ANHVDYRQWYFDL         | 2         | 13     | IgG1     | 3-15     | 4  | 7      | QQYDHWPLT    | /         | /     | /     | /       | +       | /      | /      | /      | /      | /      | /      | /      | /      | +    |
| VB142  | 3-33  | 1-7  | 2  | 5   | 22     | GPOYNWNNWVFDV         | 0         | 13     | IgG1     | 4-1      | 5  | 4      | QQCVSNPFT    | +         | +     | +     | +       | +       | +      | +      | +      | +      | +      | +      | +      | +      | +    |
| VB148  | 3-33  | 6-19 | 2  | 2   | 9      | GRINNSGWYLARWYFDL     | 2         | 17     | IgG2     | 1-16     | 5  | 10     | LQVNSYPT     | +         | +     | +     | +       | +       | +      | +      | +      | +      | +      | +      | +      | +      | +    |
| VB155  | 5-51  | 6-19 | 3  | 4/5 | 35     | LFGVAVAGI             | 0         | 10     | IgG1     | 3-20     | 1  | 7      | QQYSSPRT     | +         | +     | +     | +       | +       | +      | +      | +      | +      | +      | +      | +      | +      | +    |
| VB161  | 4-61  | 3-22 | 2  | 5   | 35     | GSYSFDSSGRSTDNWFDV    | 1         | 19     | IgG1     | 3-11     | 2  | 11     | QHRSDWPPMFT  | /         | /     | /     | /       | /       | /      | /      | /      | /      | /      | /      | /      | /      | /    |
| VB162  | 3-48  | 3-22 | 2  | 3   | 22     | DLPTMIWAVESGFDI       | 0         | 17     | IgG1     | 3-11     | 4  | 9      | QQRSTWPPFT   | /         | /     | /     | /       | +       | /      | /      | /      | /      | /      | /      | /      | /      | /    |
| VB165  | 3-30  | 1-7  | 2  | 4   | 12     | EWDEHSRNYDYFDY        | 2         | 14     | IgG1     | 3-20     | 1  | 6      | QQYSSWT      | /         | /     | /     | /       | +       | /      | +      | /      | /      | /      | /      | /      | /      | /    |
| VB168  | 5-51  | /    | /  | 4   | 8      | GTPIYDGYDPTAWSDFD     | 0         | 17     | IgG1     | 1-39     | 5  | 6      | QQSYGTLT     | /         | /     | /     | /       | /       | /      | /      | /      | /      | /      | /      | /      | /      | /    |
| VB171# | 3-33  | 6-19 | 2  | 2   | 9      | GRINNSGWYLARWYFDL     | 2         | 17     | IgG2     | 3-20     | 2  | 7      | QHYGSSPYT    |           |       |       |         |         |        |        |        |        |        |        |        |        |      |
| VB174  | 3-72  | /    | /  | 5   | 20     | LCGHCAFY              | 1         | 9      | IgG2     | 1-17     | 4  | 13     | LQHSYPLT     | /         | /     | /     | /       | /       | /      | /      | /      | /      | /      | /      | /      | /      | /    |
| VB176  | 3-74  | 2-21 | 2  | 4   | 14     | ACDAAGTALD            | 0         | 11     | IgG2     | 3-20     | 1  | 5      | QQFTASRGT    | /         | /     | /     | /       | /       | /      | /      | /      | /      | /      | /      | /      | /      | +    |
| VB179# | 3-23  | 3-3  | 1  | 4   | 15     | DGDIRFLERPIDY         | 2         | 13     | IgG1     | 1-17     | 4  | 6      | LQHDSYPLT    |           |       |       |         |         |        |        |        |        |        |        |        |        |      |
| gmVB   | VH    | D    | RF | JH  | V-Mut. | CDR3 (aa)             | (+)       | Length | Subclass | Vκ       | Jκ | V-Mut. | CDR3 (aa)    | ssDNA     | dsDNA | LPS   | insulin | Hep2    | S. aur | S.pyo  | S.pneu | E.fae  | E.coli | Pn-Vax | PedHIB | Meno   |      |
| VB13   | 5-51  | /    | /  | 4   | 24     | LTDH                  | 1         | 4      | IgG1     | 7-43     | 3  | 12     | LLFSGGAQLWV  | +         | +     | +     | +       | +       | +      | +      | +      | +      | +      | +      | +      | +      | +    |
| VB18   | 1-46  | 6-13 | 2  | 4   | 17     | ADSSSLKSAAPAFY        | 1         | 14     | IgG1     | 1-51     | 2  | 5      | GAWDSLSLVV   | /         | /     | /     | /       | /       | /      | /      | /      | /      | /      | /      | /      | /      | /    |
| VB28   | 3-23  | 2-15 | 3  | 4   | 17     | EVAEYGNPLFDH          | 1         | 12     | IgG1     | 2-11     | 3  | 6      | SSYAGSCL     | /         | /     | /     | /       | +       | /      | /      | /      | /      | /      | /      | /      | /      | /    |
| VB43   | 1-69* | 2-2  | 2  | 6   | 11     | GRFGYCSGTSCYNYGMDV    | 1         | 19     | IgG3     | 2-11     | 3  | 10     | CLYANSYTFEV  | +         | +     | +     | +       | +       | +      | +      | +      | +      | +      | +      | +      | +      | +    |
| VB45   | 3-21  | 3-10 | 2  | 6   | 11     | PDYSGGNYYYGMDV        | 0         | 17     | IgG3     | 2-14     | 1  | 3      | RSYTNNTLV    | /         | /     | /     | /       | /       | /      | /      | +      | /      | +      | /      | /      | /      | /    |
| VB53   | 5-51  | /    | /  | 4   | 19     | SVAGGTFDY             | 0         | 9      | IgG1     | 2-14     | 3  | 12     | SSYTTSDTWV   | /         | /     | /     | /       | +       | /      | +      | /      | /      | /      | /      | /      | /      | /    |
| VB70   | 4-59  | 3-22 | 2  | 3   | 18     | ERRYYLDSSGFYSFDDAFDI  | 2         | 20     | IgG1     | 1-44     | 3  | 9      | AVWDDSRNGPV  | /         | /     | /     | /       | +       | +      | +      | +      | +      | +      | +      | +      | +      | +    |
| VB73#  | 3-53  | /    | /  | 1   | 19     | WW                    | 0         | 2      | IgG2     | 7-46*    | 3  | 15     | SLSYSGTOV    |           |       |       |         |         |        |        |        |        |        |        |        |        |      |
| VB75   | 3-21  | 1-1  | 2  | 6   | 8      | DTRLWDDNNVNSYNYYYGLDV | 1         | 24     | IgG3     | 2-14     | 3  | 6      | SSYTSSSIPGV  | /         | /     | /     | /       | +       | /      | +      | /      | /      | /      | /      | /      | /      | /    |
| VB90#  | 3-21  | /    | /  | 4   | 14     | DPDHARPIDY            | 2         | 10     | IgG2     | 4-69     | 3  | 8      | QDTPWPMGV    |           |       |       |         |         |        |        |        |        |        |        |        |        |      |
| VB101  | 3-23  | /    | /  | 6   | 15     | VMTPRGGMDV            | 1         | 10     | IgG2     | 1-51     | 3  | 5      | GTWDNSLGRV   | /         | /     | /     | /       | /       | /      | /      | /      | /      | /      | /      | /      | /      | /    |
| VB102  | 4-31* | 3-16 | 1  | 4   | 21     | VGLVPLATEYFDY         | 0         | 15     | IgG1     | 2-11     | 3  | 8      | CSYAGSFIYWV  | /         | /     | /     | /       | +       | +      | /      | /      | +      | +      | /      | +      | +      | +    |
| VB107# | 5-51  | /    | /  | 6   | 12     | RGISPYYYGLDV          | 1         | 12     | IgG1     | 1-47     | 3  | ND     | AAWDDNLLNGPV |           |       |       |         |         |        |        |        |        |        |        |        |        |      |
| VB108  | 3-64  | 3-9  | 1  | 4   | 25     | DRCTVIRDFDS           | 2         | 11     | IgG2     | 7-43     | 2  | 11     | LLYGDVAV     | /         | /     | /     | /       | +       | /      | /      | /      | /      | /      | /      | /      | /      | /    |
| VB117# | 4-28  | 2-21 | 2  | 5   | 23     | DLYKSACDCGWFDV        | 1         | 14     | IgG1     | 2-23     | 2  | 6      | CSYAGNVV     | /         | /     | /     | /       | /       | /      | /      | /      | /      | /      | /      | /      | /      | /    |
| VB138  | 3-7*  | /    | /  | 4   | 19     | SFWNIQNDY             | 0         | 9      | IgG2     | 7-46*    | 3  | 8      | LLSYGARV     | /         | /     | /     | /       | /       | /      | /      | /      | /      | /      | /      | /      | /      | /    |
| VB157  | 3-30  | 3-9  | 2  | 3   | 9      | DEPYESTGYQNGFDI       | 0         | 15     | IgG3     | 3-1      | 2  | 6      | QAWDSSSVV    | /         | /     | /     | /       | /       | /      | /      | /      | /      | /      | /      | /      | /      | /    |
| VB164  | 3-7*  | 6-13 | 2  | 1   | 16     | EDFYSWYD              | 0         | 8      | IgG1     | 1-51     | 2  | 5      | ATWDSAKL     | /         | /     | /     | /       | /       | /      | /      | /      | /      | /      | /      | /      | /      | /    |
| VB173  | 3-21  | 3-22 | 2  | 6   | 20     | EDRSGHYYGFDV          | 2         | 12     | IgG2     | 1-47     | 2  | 5      | AAWDDSRSAVV  | /         | /     | /     | /       | +       | +      | +      | +      | +      | +      | +      | +      | +      | +    |

#, antibody was not expressed/tested; \*, polymorphic alleles; RF, D gene reading frame; V-Mut., number of mutations within V region; (+), positive charges in IgH CDR3; +, reactive in ELISA; /, nonreactive in ELISA; ND, not determined. S. aur, Staphylococcus aureus (protein A); S. pyo, Streptococcus pyogenes; E. fae, Enterococcus faecalis; E.coli, Escherichia coli; Pn-Vax, Pneumovax23; PedHIB, PedvaxHIB; Meno, Menomune



**Table S3.** Sequence data and reactivity of antibodies from IgG+ memory B cells from healthy donor HW.

| Ig      |      | HEAVY |    |    |        |                        | LIGHT |        |          |                |                | REACTIVITY |               |        |       |       |     |         |      |        |       |        |       |        |        |        |      |
|---------|------|-------|----|----|--------|------------------------|-------|--------|----------|----------------|----------------|------------|---------------|--------|-------|-------|-----|---------|------|--------|-------|--------|-------|--------|--------|--------|------|
| gmHW    | VH   | D     | RF | JH | V-Mut. | CDR3 (aa)              | (+)   | Length | Subclass | V <sub>κ</sub> | J <sub>κ</sub> | V-Mut.     | CDR3 (aa)     | Length | ssDNA | dsDNA | LPS | insulin | HEp2 | S. aur | S.pyo | S.pneu | E.fae | E.coli | Pn-Vax | PedHIB | Meno |
| HW 106# | 4-61 | 5-12  | 2  | 5  | 25     | LQASGYDYAPYWFDFH       | 1     | 15     | IgG1     | 4-1            | 1              | 21         | QQYTYTPPT     | 9      |       |       |     |         |      |        |       |        |       |        |        |        |      |
| HW 120  | 4-31 | 4-23  | 2  | 4  | 26     | ELLATGGKGFDFY          | 1     | 12     | IgG3     | 3-15           | 2              | 13         | HQYNWPPTYT    | 10     | /     | /     | /   | /       | /    | /      | /     | /      | /     | /      | /      | /      | /    |
| HW 149  | 3-21 | /     | /  | 4  | 16     | GYFDY                  | 0     | 5      | IgG3     | 1-6            | 1              | 6          | LQDYNYPRT     | 9      | /     | /     | /   | /       | /    | /      | /     | +      | /     | /      | /      | /      | /    |
| HW 154  | 3-53 | /     | /  | 4  | 13     | DPGDLDTLDF             | 0     | 10     | IgG2     | 3-15           | 5              | 13         | QQYNNWPPIT    | 10     | /     | /     | /   | /       | /    | /      | /     | /      | /     | /      | /      | /      | /    |
| HW 156  | 3-7  | /     | /  | 4  | 18     | RVEPTVKSFDFY           | 1     | 11     | IgG2     | 3-15           | 5              | 10         | QQYNKWPPLT    | 10     | /     | /     | /   | /       | /    | /      | /     | +      | +     | /      | /      | +      | /    |
| HW 161  | 3-74 | 1-26  | 2  | 4  | 10     | LISGTYFRYYDY           | 1     | 12     | IgG3     | 3-15           | 2              | 1          | QQYNNWPPVT    | 10     | +     | +     | +   | +       | +    | +      | +     | +      | +     | +      | +      | +      | +    |
| HW 168  | 4-39 | 3-19  | 3  | 6  | 20     | HRMMLTGGVLDYVYGMADI    | 2     | 19     | IgG1     | 3-15           | 3              | 7          | QQYNNWPHFT    | 10     | /     | /     | /   | /       | /    | /      | /     | /      | /     | /      | /      | /      | /    |
| HW 169  | 1-18 | 2-15  | 2  | 4  | 17     | ACSGGSCYSELPDY         | 0     | 14     | IgG1     | 3-15           | 2              | 1          | QQYNNWPPYT    | 10     | /     | /     | /   | /       | /    | /      | /     | /      | /     | /      | /      | /      | /    |
| HW 175  | 1-18 | 3-10  | 3  | 4  | 20     | HLVRGVINRSFDS          | 3     | 13     | IgG3     | 3-20           | 1              | 10         | QQYGTSPWT     | 9      | +     | +     | +   | +       | +    | +      | +     | +      | +     | +      | +      | +      | +    |
| HW 209# | 4-39 | 3-22  | 3  | 4  | 19     | GAITMIKVATHFDY         | 2     | 14     | IgG1     | 3-15           | 3              | 6          | QHYNWPPWT     | 8      |       |       |     |         |      |        |       |        |       |        |        |        |      |
| HW 221  | 3-74 | /     | /  | 5  | 14     | GWAATYYFPF             | 0     | 10     | IgG1     | 3-20           | 4              | 3          | QQYGSPLT      | 9      | /     | +     | +   | +       | +    | +      | /     | /      | +     | +      | /      | +      | +    |
| HW 224  | 3-15 | /     | /  | 3  | 28     | GWKGSFDM               | 1     | 8      | IgG2     | 4-1            | 2              | 13         | QQYYSTPYT     | 9      | /     | /     | 4-1 | /       | /    | /      | +     | /      | /     | /      | /      | /      | /    |
| HW 230  | 3-7  | 5-12  | 2  | 1  | 8      | DSEYSSSYWYRFFH         | 3     | 14     | IgG1     | 3-15           | 4              | 6          | QQYNDWPPLT    | 10     | /     | /     | /   | /       | /    | /      | +     | +      | +     | /      | /      | +      | /    |
| HW 247  | 3-9  | 3-22  | 2  | 3  | 13     | GFFDSGGYWDADFID        | 0     | 14     | IgG1     | 3-20           | 2              | 7          | QQYGNST       | 8      | /     | /     | /   | /       | /    | /      | /     | /      | /     | /      | /      | /      | /    |
| HW 266  | 3-9  | 6-13  | 3  | 2  | 31     | ASLTAAMGYFDL           | 0     | 14     | IgG2     | 1-5*           | 4              | 8          | QQYSTSALT     | 10     | /     | /     | /   | /       | /    | /      | /     | /      | /     | /      | /      | /      | /    |
| HW 285  | 3-33 | 6-19  | 2  | 4  | 9      | DISGWLSNNFDY           | 0     | 13     | IgG1     | 1D-39          | 2              | 7          | QQSYSSPYT     | 9      | /     | /     | /   | /       | /    | /      | /     | /      | /     | /      | /      | /      | /    |
| HW 290  | 3-15 | /     | /  | 4  | 9      | ESYGPFFD               | 0     | 8      | IgG1     | 1-5*           | 1              | 6          | QQYNSYSGT     | 9      | /     | /     | /   | /       | /    | /      | /     | /      | /     | /      | /      | /      | /    |
| HW 307  | 4-39 | 3-22  | 2  | 4  | 24     | ENYDMSGYYPAPRPAFFDS    | 1     | 20     | IgG1     | 1D-39          | 1              | 17         | QQSYSPRT      | 9      | /     | /     | /   | /       | /    | /      | /     | /      | /     | /      | /      | /      | /    |
| HW 311  | 4-59 | 1-20  | 2  | 6  | 33     | GPRVSAWNRDLQRLTFHYGLDL | 4     | 22     | IgG1     | 3-20           | 1              | 21         | HQYGSPLT      | 9      | /     | /     | /   | /       | /    | /      | /     | /      | /     | /      | /      | /      | /    |
| HW 326  | 3-7  | 6-13  | 3  | 4  | 25     | NKIPAADCLDY            | 1     | 11     | IgG2     | 1-5*           | 1              | 11         | QQFPGWV       | 7      | /     | /     | /   | /       | /    | /      | /     | /      | /     | /      | /      | /      | /    |
| HW 329  | 4-34 | 3-9   | 2  | 3  | 30     | ASAYDILTGYSLDAFDI      | 0     | 18     | IgG2     | 3-20           | 2              | 6          | QHYGSSPPRYT   | 11     | /     | /     | /   | /       | /    | /      | /     | /      | /     | /      | /      | /      | /    |
| HW 337  | 4-34 | 2-15  | 2  | 4  | 18     | GLYPGYCSGDICYSGPMGY    | 0     | 19     | IgG1     | 3-20           | 1              | 11         | QQYGTSPHRT    | 10     | +     | +     | +   | +       | +    | ND     | ND    | ND     | ND    | ND     | ND     | ND     | ND   |
| HW 352  | 1-3* | 3-10  | 3  | 4  | 35     | DHDGNVRGVVNPYFFDY      | 2     | 17     | IgG4     | 3-20           | 4              | 20         | QQYGTSPLT     | 9      | /     | /     | /   | /       | /    | /      | /     | /      | /     | /      | /      | /      | /    |
| HW 376  | 4-28 | /     | /  | 5  | 46     | YDKSIRPFDS             | 2     | 10     | IgG2     | 3-20           | 2              | 21         | LQSHASPF      | 9      | /     | /     | /   | /       | /    | /      | /     | /      | /     | /      | /      | /      | /    |
| HW 378  | 1-46 | 3-22  | 2  | 4  | 15     | SYYYDSSRGIDF           | 1     | 12     | IgG1     | 1-27           | 1              | 6          | QKCNFAPWT     | 9      | /     | /     | /   | /       | +    | /      | /     | /      | /     | /      | /      | /      | /    |
| HW 386# | 3-30 | 5-24  | 3  | 5  | 12     | TWGRITMGRFPD           | 1     | 12     | IgG1     | 1D-39          | 2              | 12         | QQSYRASVT     | 9      |       |       |     |         |      |        |       |        |       |        |        |        |      |
| HW 387  | 1-46 | 3-9   | 1  | 3  | 16     | DPTDEILASNDWFFPRGGPDM  | 1     | 21     | IgG1     | 3-20           | 4              | 7          | QQYGVSLVT     | 9      | /     | /     | /   | /       | /    | /      | /     | /      | /     | /      | /      | /      | /    |
| gmHW    | VH   | D     | RF | JH | V-Mut. | CDR3 (aa)              | (+)   | Length | Subclass | V <sub>λ</sub> | J <sub>λ</sub> | V-Mut.     | CDR3 (aa)     | Length | ssDNA | dsDNA | LPS | insulin | HEp2 | S. aur | S.pyo | S.pneu | E.fae | E.coli | Pn-Vax | PedHIB | Meno |
| HW 101# | 1-18 | /     | /  | 4  | 24     | YLDGNYFDY              | 1     | 10     | IgG1     | 2-23*          | 2              | 5          | CSYAGRSTLI    | 10     |       |       |     |         |      |        |       |        |       |        |        |        |      |
| HW 109  | 3-30 | 3-10  | 2  | 5  | 20     | CGDYGGSGTYPNWFDP       | 1     | 16     | IgG2     | 2-11           | 1              | 10         | CSYAGSYTFV    | 10     | /     | /     | /   | /       | /    | /      | /     | /      | /     | /      | /      | /      | /    |
| HW 124  | 3-7  | /     | /  | 4  | 21     | DQASGKYDY              | 1     | 9      | IgG2     | 1-40           | 1              | 6          | QSHDRSLNAYV   | 11     | /     | /     | /   | /       | /    | /      | /     | /      | /     | /      | /      | /      | /    |
| HW 157# | 3-23 | 3-10  | 3  | 5  | 25     | GAPGILVRGVIRVTPFDS     | 1     | 18     | IgG2     | 7-43           | 3              | 14         | LLNFDNYVV     | 9      |       |       |     |         |      |        |       |        |       |        |        |        |      |
| HW 158  | 3-11 | 6-19  | 2  | 5  | 15     | VWCSGWCPREFYRLDS       | 2     | 16     | IgG1     | 2-14           | 2              | 12         | TSYTSSGTFV    | 11     | /     | /     | /   | /       | /    | +      | +     | +      | +     | +      | /      | /      | +    |
| HW 174  | 7-81 | 6-13  | 2  | 6  | 9      | THRLYNNSWFLPYDMDV      | 2     | 18     | IgG1     | 2-14*          | 1              | 3          | SSYTTTSTYV    | 10     | +     | +     | +   | +       | +    | +      | +     | +      | +     | +      | +      | +      | +    |
| HW 177  | 5-51 | 2-15  | 2  | 1  | 21     | LVRDCSGGSCYSPPEKPHFQN  | 3     | 21     | IgG1     | 1-47*          | 3              | 11         | ATWDDSLSTSWL  | 12     | /     | /     | /   | +       | /    | +      | +     | +      | +     | +      | +      | +      | +    |
| HW 181  | 1-46 | /     | /  | 4  | 27     | DNGKWAFDY              | 1     | 9      | IgG2     | 2-14*          | 3              | 8          | CSFTRSDAWV    | 10     | /     | /     | /   | /       | /    | /      | /     | +      | /     | /      | /      | /      | /    |
| HW 182  | 4-39 | /     | /  | 4  | 13     | PGTWPHYFYFDY           | 1     | 12     | IgG2     | 2-14*          | 2              | 8          | SSYTSSSSVV    | 10     | /     | /     | /   | /       | /    | /      | /     | /      | /     | /      | /      | /      | +    |
| HW 205  | 1-69 | 3-22  | 2  | 6  | 23     | VLYDRYSWFYFYALDV       | 1     | 18     | IgG1     | 2-11           | 2              | 21         | CSYTDTV       | 8      | +     | +     | +   | +       | +    | +      | +     | +      | +     | +      | +      | +      | +    |
| HW 225  | 3-30 | 4-17  | 2  | 5  | 9      | DRDYGDPPNWFDP          | 1     | 14     | IgG1     | 1-40           | 3              | 4          | QSYDSSLSGWV   | 11     | /     | /     | /   | /       | /    | /      | /     | /      | /     | /      | /      | /      | /    |
| HW 231  | 3-21 | 6-13  | 1  | 2  | 25     | GGGEQLPDYWFYDL         | 0     | 15     | IgG1     | 1-51*          | 1              | 6          | GTWDDSLSTGLYV | 13     | /     | /     | /   | /       | /    | /      | /     | /      | /     | /      | /      | /      | /    |
| HW 237  | 3-48 | 2-15  | 2  | 5  | 14     | LLGYCSGGSCP            | 0     | 11     | IgG1     | 1-47*          | 2              | 1          | AAWDDSLSGPVV  | 12     | /     | /     | /   | /       | /    | +      | +     | +      | +     | +      | +      | +      | +    |
| HW 248  | 3-21 | /     | /  | 5  | 20     | VEGGLGDWYRN            | 1     | 11     | IgG1     | 1-40           | 2              | 11         | QSYDTSLSGFVI  | 12     | /     | /     | /   | /       | /    | /      | /     | /      | /     | /      | /      | /      | /    |
| HW 251  | 3-30 | /     | /  | 4  | 18     | GPATETPKIDY            | 1     | 11     | IgG2     | 1-51           | 1              | 3          | GTWDDSLSAHV   | 11     | /     | /     | /   | /       | /    | +      | /     | +      | +     | +      | +      | +      | +    |
| HW 259  | 1-46 | 2-21  | 3  | 4  | 13     | GAGQGVVTTTND           | 0     | 12     | IgG2     | 2-11           | 1              | 3          | CSWAGSYTLV    | 10     | /     | /     | /   | /       | /    | /      | /     | /      | /     | /      | /      | /      | +    |
| HW 296  | 3-21 | 5-18  | 3  | 5  | 4      | ADTAMINWFDP            | 0     | 11     | IgG1     | 2-14*          | 3              | 1          | SSHTSSSTRV    | 10     | /     | /     | /   | /       | /    | /      | /     | /      | /     | /      | /      | /      | /    |
| HW 313  | 3-33 | 3-9   | 2  | 6  | 10     | VYDFWSGGYGYGMDV        | 0     | 17     | IgG3     | 2-23*          | 3              | 8          | CSYATSSTLV    | 10     | /     | /     | /   | /       | /    | /      | /     | /      | /     | /      | /      | /      | /    |
| HW 327# | 3-9  | 1-26  | 2  | 4  | 8      | DTYSGVATFDY            | 0     | 11     | IgG1     | 2-14*          | 3              | 8          | SSYTSSTLV     | 10     |       |       |     |         |      |        |       |        |       |        |        |        |      |
| HW 330  | 3-15 | 6-13  | 2  | 4  | 10     | PYSASWYSDY             | 0     | 10     | IgG1     | 1-40           | 2              | 6          | QSCDRLCPNVV   | 12     | +     | +     | +   | +       | +    | +      | +     | +      | +     | +      | +      | +      | +    |
| HW 338# | 3-21 | 4-17  | 3  | 4  | 20     | DPTTNMGWDFDY           | 0     | 12     | IgG1     | 1-51           | 2              | 9          | GTWDDSLSGVV   | 11     |       |       |     |         |      |        |       |        |       |        |        |        |      |
| HW 345  | 4-39 | 5-18  | 2  | 3  | 25     | FGYSYPYSAFDV           | 0     | 14     | IgG2     | 1-51*          | 2              | 7          | GTWDFRLYTGVL  | 12     | +     | +     | +   | +       | +    | +      | +     | +      | +     | +      | +      | +      | +    |
| HW 355  | 3-73 | 6-25  | 2  | 4  | 18     | HAASGRDC               | 2     | 8      | IgG1     | 6-57           | 3              | 9          | QSYDSSSHWV    | 10     | +     | +     | +   | +       | +    | +      | +     | +      | +     | +      | +      | +      | +    |
| HW 357# | 3-33 | 3-10  | 3  | 6  | 3      | DQPRITMVRGVPOIYCYVMDV  | 2     | 21     | IgG1     | 1-51           | 2              | 4          | GTWDDSLSAGGV  | 12     |       |       |     |         |      |        |       |        |       |        |        |        |      |
| HW 360  | 1-46 | 3-3   | 2  | 6  | 6      | GMNYDFWSPWAIYVYVGMVDV  | 0     | 21     | IgG1     | 2-14*          | 1              | 2          | NSYTSSTTLV    | 10     | +     | +     | +   | +       | +    | +      | +     | +      | +     | +      | +      | +      | +    |

#, antibody was not expressed/tested; \*, polymorphic alleles; RF, D gene reading frame; V-Mut., number of mutations within V region; (+), positive charges in IgH CDR3; +, reactive in ELISA; /, nonreactive in ELISA; ND, not determined, S. aur, Staphylococcus aureus (protein A-); S. pyo, Streptococcus pyogenes; E. fae, Enterococcus faecalis; E.coli, Escherichia coli; Pn-Vax, Pneumovax23; PedHIB, PedvaxHIB; Meno, Menomune

**Table S4.** Sequences and reactivity of reverted antibodies from IgG+ memory B cells

| Ig    | HEAVY |      |    |    |        |                      | LIGHT                |         |      |        |              | REACTIVITY (original) |      | REACTIVITY (reverted) |      |      |
|-------|-------|------|----|----|--------|----------------------|----------------------|---------|------|--------|--------------|-----------------------|------|-----------------------|------|------|
|       | VH    | D    | RF | JH | V-Mut. | CDR3 (aa)            | Reverted CDR3 (aa)   | Vκ/λ    | Jκ/λ | V-Mut. | CDR3 (aa)    | Reverted CDR3 (aa)    | poly | HEp2                  | poly | HEp2 |
| PN7   | 3-74  | 1-7  | 3  | 4  | 9      | RVTGTTSDFDY          | RVTGTTSDFDY          | λ 7-46  | 2    | 5      | LLSYSGTRV    | LLSYSGARV             | +    | +                     | /    | /    |
| PN8   | 4-59  | 4-23 | 2  | 1  | 13     | GDDYGVPFQH           | GDDYGVPFQH           | κ 4-1   | 2    | 7      | QQYYSNPRT    | QQYYSQPQT             | +    | +                     | +    | /    |
| PN46  | 4-34  | 3-10 | 2  | 5  | 22     | RPYYYSGTGWS          | RPYYYSGTGWS          | κ 3-20  | 4    | 8      | QQYDNSPFT    | QQYGSSPFT             | +    | +                     | /    | +    |
| PN56  | 3-23  | 3-3  | 2  | 4  | 11     | AFDLWSGWPFAY         | AFDFWSGWPFDY         | κ 3-20  | 5    | 5      | QQYDSSPIT    | QQYGSSPIT             | +    | +                     | /    | /    |
| PN60  | 3-7   | 6-19 | 2  | 4  | 13     | GWGWLPD              | GWGWLPDY             | κ 3-20  | 3    | 19     | QQYAISPIT    | QQYGSSPIT             | /    | /                     | /    | /    |
| PN67  | 4-59  | 5-12 | 2  | 5  | 22     | DRERGSYSGYGLDP       | DRERGSYSGYGLDP       | λ 1-47  | 1    | 10     | ASWDDSLSGLYV | AAWDDSLSGLYV          | /    | /                     | /    | /    |
| PN69  | 1-8   | 2-8  | 2  | 4  | 17     | GRGYCTNGVCYGATKYFDY  | GRGYCTNGVCYGATKYFDY  | λ 2-14  | 2    | 8      | SSYTTNVI     | SSYTTNVI              | /    | /                     | /    | /    |
| PN89  | 3-74  | 3-9  | 2  | 6  | 17     | LGFPQRHDILTGHYLDGMDV | LGFPQRHDILTGHYLDGMDV | κ 2-30  | 1    | 3      | MQGTHWPPWT   | MQGTHWPPWT            | +    | +                     | /    | /    |
| PN107 | 3-7   | 1-1  | 2  | 3  | 21     | DNWQQGVRDGFVDV       | DNWQQGVRDAFDV        | λ 1-40  | 3    | 13     | QSYDRLRNWV   | QSYDSSLNWW            | +    | +                     | /    | /    |
| PN115 | 3-7   | 3-3  | 2  | 6  | 25     | DYDFWSGYSYYYYGMDV    | DYDFWSGYSYYYYGMDV    | λ 1-51  | 3    | 9      | GTWDSLSVVRV  | GTWDSLSAWV            | /    | /                     | /    | /    |
| PN116 | 4-34  | /    | /  | 3  | 25     | GGGGFDV              | GGGGFDV              | κ 1-39  | 1    | 14     | QQSYTTPWT    | QQSYSTPWT             | /    | /                     | +    | +    |
| PN119 | 1-69* | 2-21 | 3  | 6  | 23     | DLQGYVTVTAMDV        | DLQGYVVTAMDV         | κ 1-5*  | 1    | 10     | QHYSYFYT     | QQYNSYSGT             | /    | +                     | /    | +    |
| PN153 | 3-9   | /    | /  | 6  | 8      | SLRRYYYYGMDV         | SLRRYYYYGMDV         | λ 1-40  | 3    | 5      | QSYDSLGSWGV  | QSYDSSLGSWGV          | /    | /                     | /    | /    |
| PN162 | 1-69* | 3-22 | 2  | 4  | 28     | GMHDSSSFYPTQNFYD     | GMHDSSGYPTQNFYD      | κ 3-11  | 4    | 11     | QQRSNWPLT    | QQRSNWPLT             | /    | +                     | /    | +    |
| PN189 | 3-11  | /    | /  | 6  | 9      | GVWGAYYYYGMDV        | GVWGAYYYYGMDV        | κ 1-5*  | 1    | 5      | QQSNYPWT     | QQYNSYSWT             | /    | /                     | /    | /    |
| VB13  | 5-51  | /    | /  | 4  | 24     | LTDH                 | LTDY                 | λ 7-43  | 3    | 12     | LLFSGGAQLWV  | LLYGGGAQLWV           | +    | +                     | /    | /    |
| VB18  | 1-46  | 6-13 | 2  | 4  | 17     | ADSSSLKSAAPAFY       | ADSSSLKSAAPALY       | λ 1-51  | 2    | 5      | GAWDSLSV     | GTWDSLSV              | /    | /                     | /    | /    |
| VB28  | 3-23  | 2-15 | 2  | 4  | 17     | EVAEIGNPLFDH         | EVAEIGNPLFDH         | λ 2-11  | 3    | ND     | SSYAGSCL     | CSYAGSCL              | /    | +                     | /    | /    |
| VB45  | 3-21  | 3-10 | 2  | 6  | 11     | PDYGSNGYYYYGMDV      | PDYGSNGYYYYGMDV      | κ 2-14  | 1    | 3      | RSYTNSTLV    | SSYTSSTLV             | /    | /                     | /    | /    |
| VB111 | 3-48  | 2-21 | 3  | 4  | 8      | DRVVGIFDH            | DRVVILYY             | κ 4-1   | 1    | 2      | QQYYSIPWT    | QQYYSIPWT             | /    | +                     | /    | /    |
| VB126 | 4-39  | /    | /  | 5  | 34     | HVLVDDPNWFDP         | HVLVDDPNWFDS         | κ 3D-15 | 3    | 9      | QHYNRWPPGIT  | QQYNNWPPGIT           | +    | +                     | /    | /    |
| VB132 | 3-23  | 3-22 | 2  | 3  | 15     | TYYYDMSG             | TYYYDSSG             | κ 1-5   | 4    | 9      | QHYSYPLT     | QQYNSYPLT             | +    | +                     | /    | /    |
| VB148 | 3-33  | 6-19 | 2  | 2  | 9      | GRINSSGWYLARWYFDL    | GRINSSGWYLARWYFDL    | κ 1-16  | 5    | 10     | LQYNSYPPT    | QQYNSYPPT             | +    | +                     | +    | +    |
| VB161 | 4-61  | 3-22 | 2  | 5  | 35     | GSYSDFSSGRSTDNNWFDP  | GSYYDFSSGRSTDNNWFDP  | κ 3-11  | 2    | 11     | QHRSDWPPMFT  | QQRSNWPPMYT           | /    | /                     | /    | /    |
| HW154 | 3-53  | /    | /  | 4  | 13     | DPGDLDLDF            | DPGDLDLDF            | κ 3-15  | 5    | 13     | QQYNNWPPIT   | QQYNNWPPIT            | /    | /                     | /    | /    |
| HW156 | 3-7   | /    | /  | 4  | 18     | RVEPTVKSFYD          | RVEPTVKSFYD          | κ 3-15  | 5    | 10     | QQYNNWPPIT   | QQYNNWPPIT            | /    | /                     | /    | /    |
| HW168 | 4-39  | 3-19 | 3  | 6  | 20     | HRMMLTGGVLDYYYYGMDI  | HRMITFGGVLDYYYYGMDV  | κ 3-15  | 3    | 7      | QQYNNWPPFT   | QQYNNWPPFT            | /    | /                     | +    | +    |
| HW169 | 1-18  | 2-15 | 2  | 4  | 17     | ACSGGSCYSELPDY       | ACSGGSCYSELPDY       | κ 3-15  | 2    | 1      | QQYNNWPPYT   | QQYNNWPPYT            | /    | /                     | /    | /    |
| HW175 | 1-18  | 3-10 | 3  | 4  | 20     | HLVRGVINRSFDS        | HLVRGVINRYFDS        | κ 3-20  | 1    | 10     | QQYGTSPWT    | QQYGSSPWT             | +    | +                     | /    | /    |
| HW181 | 1-46  | /    | /  | 4  | 27     | DNGKWAFDY            | DNGKWAFDY            | λ 2-14  | 3    | 8      | CSFTRSDAWV   | SSYTSSTWV             | /    | /                     | /    | /    |
| HW182 | 4-39  | /    | /  | 4  | 13     | PGTTWPHYFDY          | PGTTWPHYFDY          | λ 2-14  | 2    | 8      | SSYTSSSV     | SSYTSSTV              | /    | /                     | /    | /    |
| HW221 | 3-74  | /    | /  | 5  | 14     | GWAATYYPF            | GWAATYYPF            | κ 3-20  | 4    | 3      | QQYGSPLT     | QQYGSPLT              | +    | +                     | +    | +    |
| HW224 | 3-15  | /    | /  | 3  | 28     | GWKGSFDM             | GWKGSFDV             | κ 4-1   | 2    | 13     | QQYSTPYT     | QQYSTPYT              | /    | /                     | /    | /    |
| HW230 | 3-7   | 5-12 | 2  | 1  | 8      | DSEYSSSWYNRFH        | DSEYSSSWYNRFH        | κ 3-15  | 4    | 6      | QQYNDWPLT    | QQYNNWPLT             | /    | /                     | /    | /    |
| HW237 | 3-48  | 2-15 | 2  | 5  | 14     | LLGYCSGGSCP          | LLGYCSGGSCP          | λ 1-47  | 2    | 1      | AAWDDSLSGPVV | AAWDDSLSGPVV          | /    | +                     | /    | /    |
| HW378 | 1-46  | 3-22 | 2  | 4  | 15     | SYYYDSSRGIDF         | SYYYDSSRGIDY         | κ 1-27  | 1    | 6      | QKCNFAPWT    | QKYNFAPWT             | /    | +                     | /    | /    |

\*, polymorphic alleles; reverted amino acids in CDR3s are in bold; RF, reading frame; V-Mut., number of mutations within V region; ND, not determined; +, reactive in ELISA; /, nonreactive in ELISA; poly, polyreactive to ss/dsDNA, LPS, and insulin; HEp2, reactive in HEp2 ELISA and/or IFA
