# Supplementary material
Source: PubMed Central journal article supplement (PMC1839941)

**Figure S1**

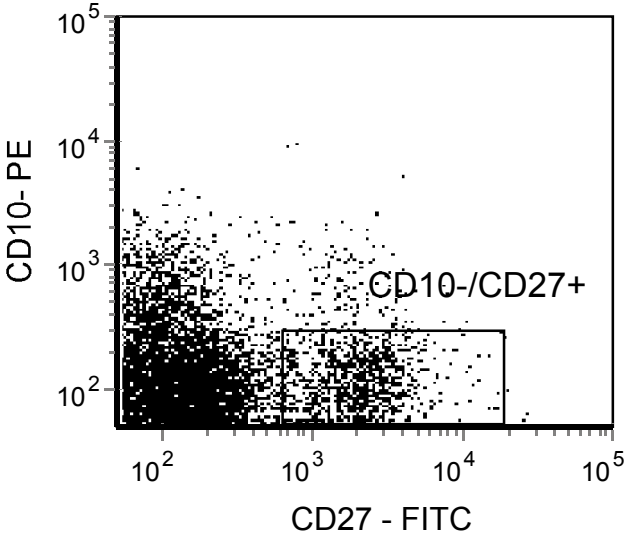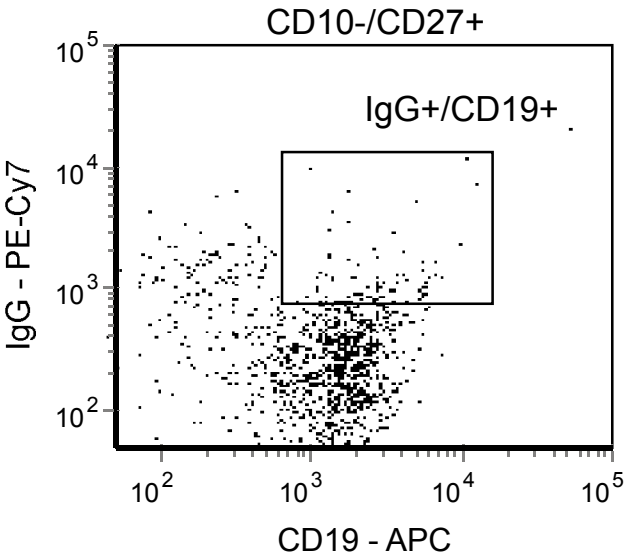

**Figure S2**

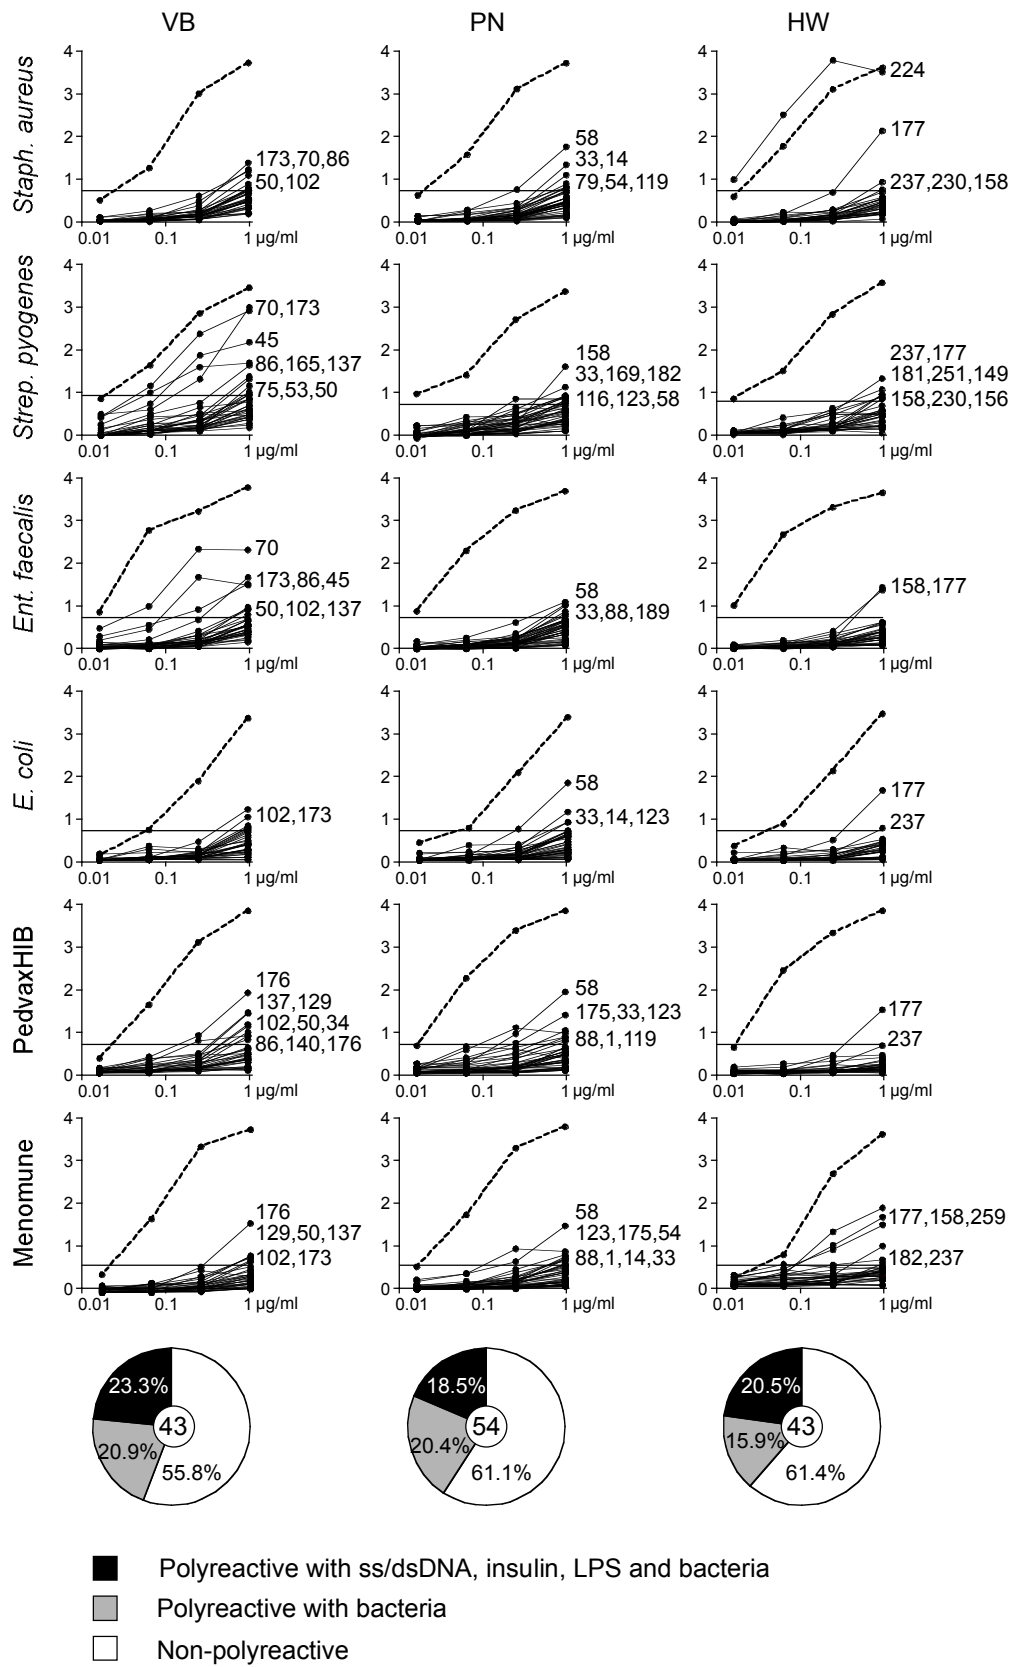

**Figure S3**

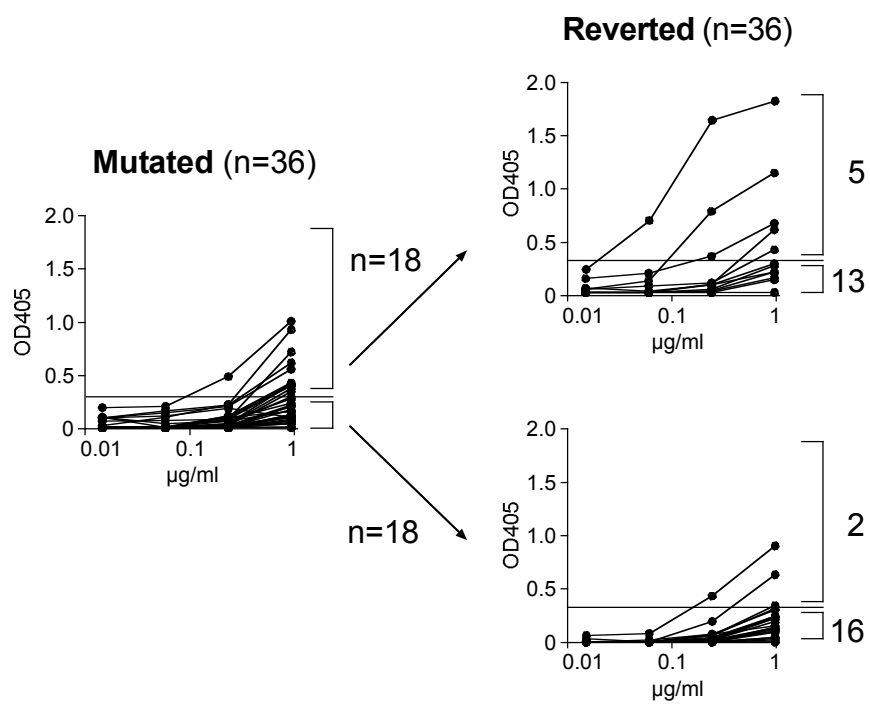

Supplement: NIHMS18855-supplement-SuppFigs.pdf [file NIHMS18855-supplement-SuppFigs.pdf]
